# Supplementary material for: Autologous Faecal Microbiota Transplantation to Improve Outcomes of Haematopoietic Stem Cell Transplantation: Results of a Single-Centre Feasibility Study
Source: MDPI journal article supplement (doi:10.3390/biomedicines11123274), 2023-12-11
Supplement: s1 [file s1]

# Supplementary tables and figures

**Table S1.** Clinical parameters and characteristics of N=4 participants receiving autologous FMT

|                                                                 | Patient 1                                                                                | Patient 2                                                                        | Patient 3                                                                                                                               | Patient 4                                                                                                                                 |
|-----------------------------------------------------------------|------------------------------------------------------------------------------------------|----------------------------------------------------------------------------------|-----------------------------------------------------------------------------------------------------------------------------------------|-------------------------------------------------------------------------------------------------------------------------------------------|
| Age (years) at time of HSCT                                     | 47                                                                                       | 53                                                                               | 65                                                                                                                                      | 34                                                                                                                                        |
| Sex                                                             | Male                                                                                     | Female                                                                           | Male                                                                                                                                    | Female                                                                                                                                    |
| Diagnosis                                                       | IgG K Multiple Myeloma                                                                   | Kappa light chain Multiple Myeloma                                               | IgG K Multiple Myeloma                                                                                                                  | IgA K Multiple Myeloma                                                                                                                    |
| Conditioning                                                    | HDM<br>140mg/m <sup>2</sup>                                                              | HDM<br>200mg/m <sup>2</sup>                                                      | HDM<br>200mg/m <sup>2</sup>                                                                                                             | HDM<br>200mg/m <sup>2</sup>                                                                                                               |
| Prophylactic and empirical antibiotics, antivirals, antifungals | Norfloxacin 400mg BD,<br>Famciclovir 250mg BD,<br>Fluconazole 200mg OD<br>Cefepime (D+9) | Trimethoprim/Sulfamethoxazole 160/800mg<br>Famciclovir 500mg BD<br>Tazocin (D+7) | Trimethoprim/Sulfamethoxazole 160/800mg BD<br>Famciclovir 500mg BD<br>Entecavir 0.5mg<br>Norfloxacin, Fluconazole<br>Azithromycin (D+8) | Trimethoprim/Sulfamethoxazole 160/800mg BD<br>Famciclovir 500mg BD<br>Norfloxacin 400mg BD<br>Fluconazole 400mg<br>(continued until D+10) |
| Body weight (kg) on day of FMT1.1                               | 85                                                                                       | 74                                                                               | 81                                                                                                                                      | 65                                                                                                                                        |
| Number of enemas given and days relative to HSCT                | 3<br>(+2 to +4)                                                                          | 3<br>(+2 to +4)                                                                  | 2<br>(+3 to +4)<br><i>FMT1.3 not given due to low ANC</i>                                                                               | 1<br>(+1)<br><i>FMT1.2 and 1.3 not given due to participant preference</i>                                                                |
| Volume as mean ± SEM (mL)                                       | 33.3 ± 14.4                                                                              | 50.0 ± 0.0                                                                       | 51.5 ± 2.1                                                                                                                              | 40.0 ± 0.0                                                                                                                                |
| Retention time as mean ± SEM (min)                              | 97.3 ± 47.0                                                                              | 63.7 ± 16.2                                                                      | 14.0 ± 5.7                                                                                                                              | 36.0 ± 0.0                                                                                                                                |
| Adverse events                                                  | N/A                                                                                      | N/A                                                                              | Campylobacter gastroenteritis infection on D+8 (not traced to FMT), and engraftment syndrome (after day 10)                             | N/A                                                                                                                                       |

**Table S2.** Clinical assessments of N=4 participants receiving autologous FMT

|                                        | Patient 1 |          |          |           | Patient 2 |          |          |           | Patient 3 |          |          |           | Patient 4 |          |          |           |
|----------------------------------------|-----------|----------|----------|-----------|-----------|----------|----------|-----------|-----------|----------|----------|-----------|-----------|----------|----------|-----------|
|                                        | Day<br>-4 | Day<br>0 | Day<br>5 | Day<br>10 |
| <b>BW (kg)</b>                         | 85*       | 91.<br>5 | 86.<br>3 | 88        | 74        | 74.<br>8 | 72.2     | 73.<br>3  | 81*       | 83       | 79.<br>9 | 80.<br>5  | 65*       | 66.<br>3 | 63.<br>4 | 64.1      |
| <b>Stool<br/>consistency<br/>(BRS)</b> | 4         | 5        | 5        | 7         | 2.5       | 1        | 4        | 6.5       | 2.5       | 1        | 4        | 6.5       | 3         | 1        | 5        | 1         |
| <b>Stools/day</b>                      | 1         | 1        | 1        | 7         | 1         | 1        | 3        | 2         | 1         | 1        | 3        | 2         | 4         | 2        | 4        | 2         |
| <b>Rectal<br/>bleeding<br/>(Y/N)</b>   | N         | N        | N        | N         | N         | N        | N        | N         | N         | N        | N        | N         | N         | N        | N        | N         |
| <b>Abdominal<br/>pain (Y/N)</b>        | N         | N        | N        | N         | N         | Y        | N        | N         | N         | N        | N        | Y         | N         | N        | N        | N         |

*\*indicates at-home (patient reported) measurement*

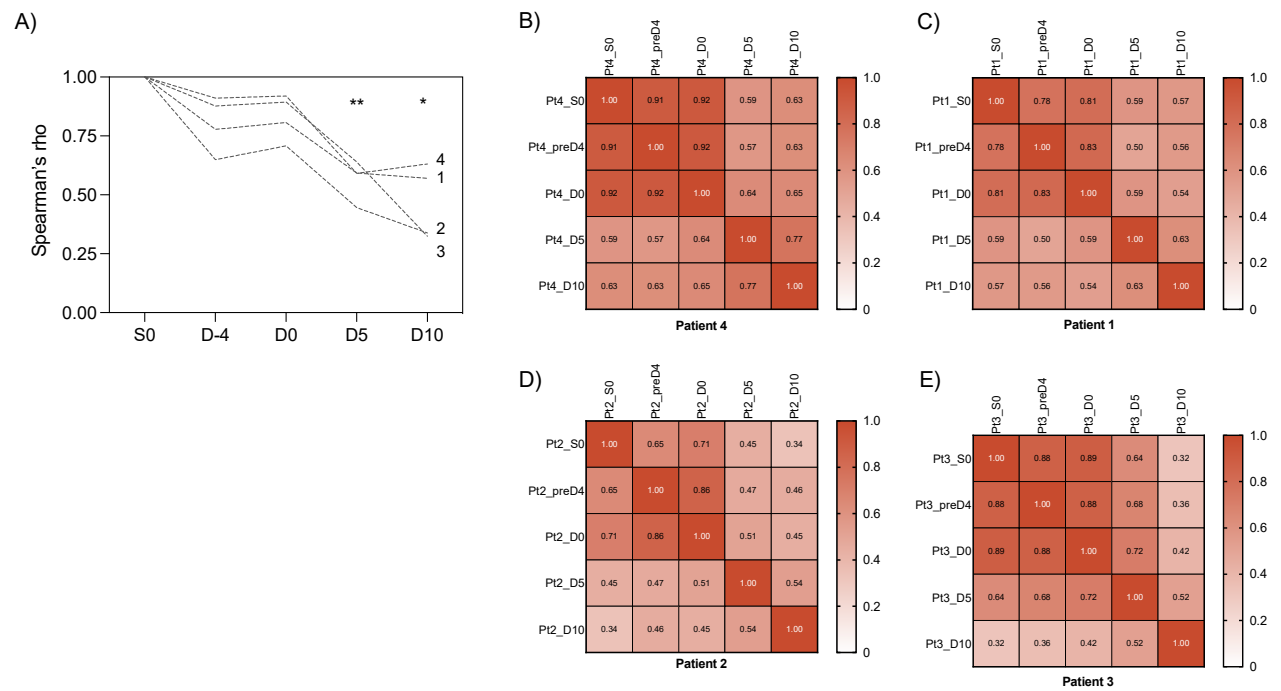

**Figure S1.** Spearman's correlation of longitudinal samples against the baseline sample of each patient as a graph (A) and as heatmaps for patients (B) 4 and (C) 1, (D) 2 and (E) 3. Data generated from relative abundance of OTUs at the genus level. \*\* indicates  $P < 0.01$ , \* indicates  $P < 0.05$  detected by one-way ANOVA against S0.
